# Supplementary material
Source: publisher figshare collection journal article supplement (https://sage.figshare.com/ndownloader/files/15342350)
Supplement: Supplementary file 1 [file 15342350]

***Supplementary table 2: Potential hierarchies of data sources for economic analyses***

| <i>A - Baseline clinical data</i> |                                                                                                                                                                                                                                                                                                                                                                                                                                                                                                             |
|-----------------------------------|-------------------------------------------------------------------------------------------------------------------------------------------------------------------------------------------------------------------------------------------------------------------------------------------------------------------------------------------------------------------------------------------------------------------------------------------------------------------------------------------------------------|
| 1                                 | <ul style="list-style-type: none"> <li>- Case series or analysis of reliable administrative databases specifically conducted for the study covering patients solely from the jurisdiction of interest</li> <li>- Recent case series or analysis of reliable administrative databases covering patients solely from the jurisdiction of interest</li> </ul>                                                                                                                                                  |
| 2                                 | <ul style="list-style-type: none"> <li>- Recent case series or analysis of reliable administrative databases covering patients from another jurisdiction</li> </ul>                                                                                                                                                                                                                                                                                                                                         |
| 3                                 | <ul style="list-style-type: none"> <li>- Old case series or analysis of reliable administrative databases Estimates from RCTs</li> </ul>                                                                                                                                                                                                                                                                                                                                                                    |
| 4                                 | <ul style="list-style-type: none"> <li>- Estimates from previously published economic analyses: unsourced</li> </ul>                                                                                                                                                                                                                                                                                                                                                                                        |
| 5                                 | <ul style="list-style-type: none"> <li>- Expert opinion</li> </ul>                                                                                                                                                                                                                                                                                                                                                                                                                                          |
| <i>B - Costs</i>                  |                                                                                                                                                                                                                                                                                                                                                                                                                                                                                                             |
| 1                                 | <ul style="list-style-type: none"> <li>- Cost calculations based on reliable databases or data sources conducted for specific study – same jurisdiction</li> <li>- Recently published cost calculations based on reliable databases or data sources – same jurisdiction</li> </ul>                                                                                                                                                                                                                          |
| 2                                 | <ul style="list-style-type: none"> <li>- Unsourced data from previous economic evaluations – same jurisdiction</li> <li>- Recently published cost calculations based on reliable databases or data sources – different jurisdiction</li> </ul>                                                                                                                                                                                                                                                              |
| 3                                 | <ul style="list-style-type: none"> <li>- Unsourced data from previous economic evaluations – different jurisdiction</li> </ul>                                                                                                                                                                                                                                                                                                                                                                              |
| 4                                 | <ul style="list-style-type: none"> <li>- Expert opinion</li> </ul>                                                                                                                                                                                                                                                                                                                                                                                                                                          |
| <i>C – outcome measure</i>        |                                                                                                                                                                                                                                                                                                                                                                                                                                                                                                             |
| 1                                 | <ul style="list-style-type: none"> <li>- Direct outcome measure assessment for the specific study from a sample either: <ul style="list-style-type: none"> <li>(a) of the general population</li> <li>(b) with knowledge of the disease(s) of interest</li> <li>(c) of patients with the disease(s) of interest</li> </ul> </li> <li>- Indirect outcome measure assessment for specific study from patient sample with disease(s) of interest; using a tool validated for the patient population</li> </ul> |
| 2                                 | <ul style="list-style-type: none"> <li>- Direct outcome measure assessment from a previous study from a sample either: <ul style="list-style-type: none"> <li>(a) of the general population</li> <li>(b) with knowledge of the disease(s) of interest</li> <li>(c) of patients with the disease(s) of interest</li> </ul> </li> <li>- Indirect outcome measure assessment from a previous study from patient</li> </ul>                                                                                     |

|   |                                                                                                                                                                                                                |
|---|----------------------------------------------------------------------------------------------------------------------------------------------------------------------------------------------------------------|
|   | sample with disease(s) of interest; using a tool validated for the patient population                                                                                                                          |
| 3 | - Indirect outcome measure assessment from a patient sample with disease(s) of interest; using a tool not validated for the patient population Patient preference values obtained from a visual analogue scale |
| 4 | - Delphi panels, expert opinion                                                                                                                                                                                |
